# Supplementary material
Source: Springer Nature journal article supplement (https://www.springermedizin.de/resource/supplementary/12885_2013_4019_MOESM3_ESM.pdf/9465006)

**(a)** New Zealand melanoma mortality for women

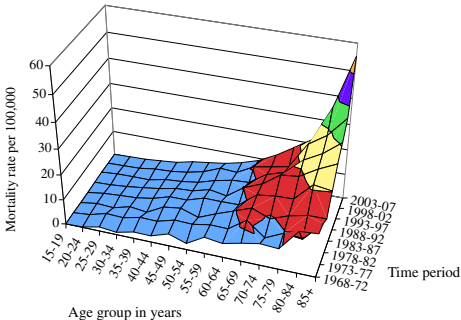

**(b)** Australian melanoma mortality for women

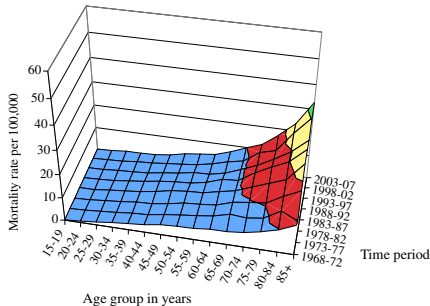

Supplement: MOESM3 [file 9465006]
